# Supplementary material for: Cardioprotective medication adherence in Western Australians in the first year after myocardial infarction: restricted cubic spline analysis of adherence-outcome relationships
Source: PubMed Central journal article supplement (PMC7062740; doi:10.1038/s41598-020-60799-5), 2020-03-09
Supplement: 41598_2020_60799_MOESM1_ESM.pdf [file 41598_2020_60799_MOESM1_ESM.pdf]

## **SUPPLEMENTARY FILE**

### **Cardioprotective medication adherence in Western Australians in the first year after myocardial infarction: restricted cubic spline analysis of adherence-outcome relationships**

Melanie Greenland, Matthew W Knuiman, Joseph Hung, Lee Nedkoff, Isabelle Arnet, Jamie M Rankin, Monique F Kilkenny, Frank M Sanfilippo.

**Supplementary Figure S1:** Flowchart of patient selection for the study cohort.

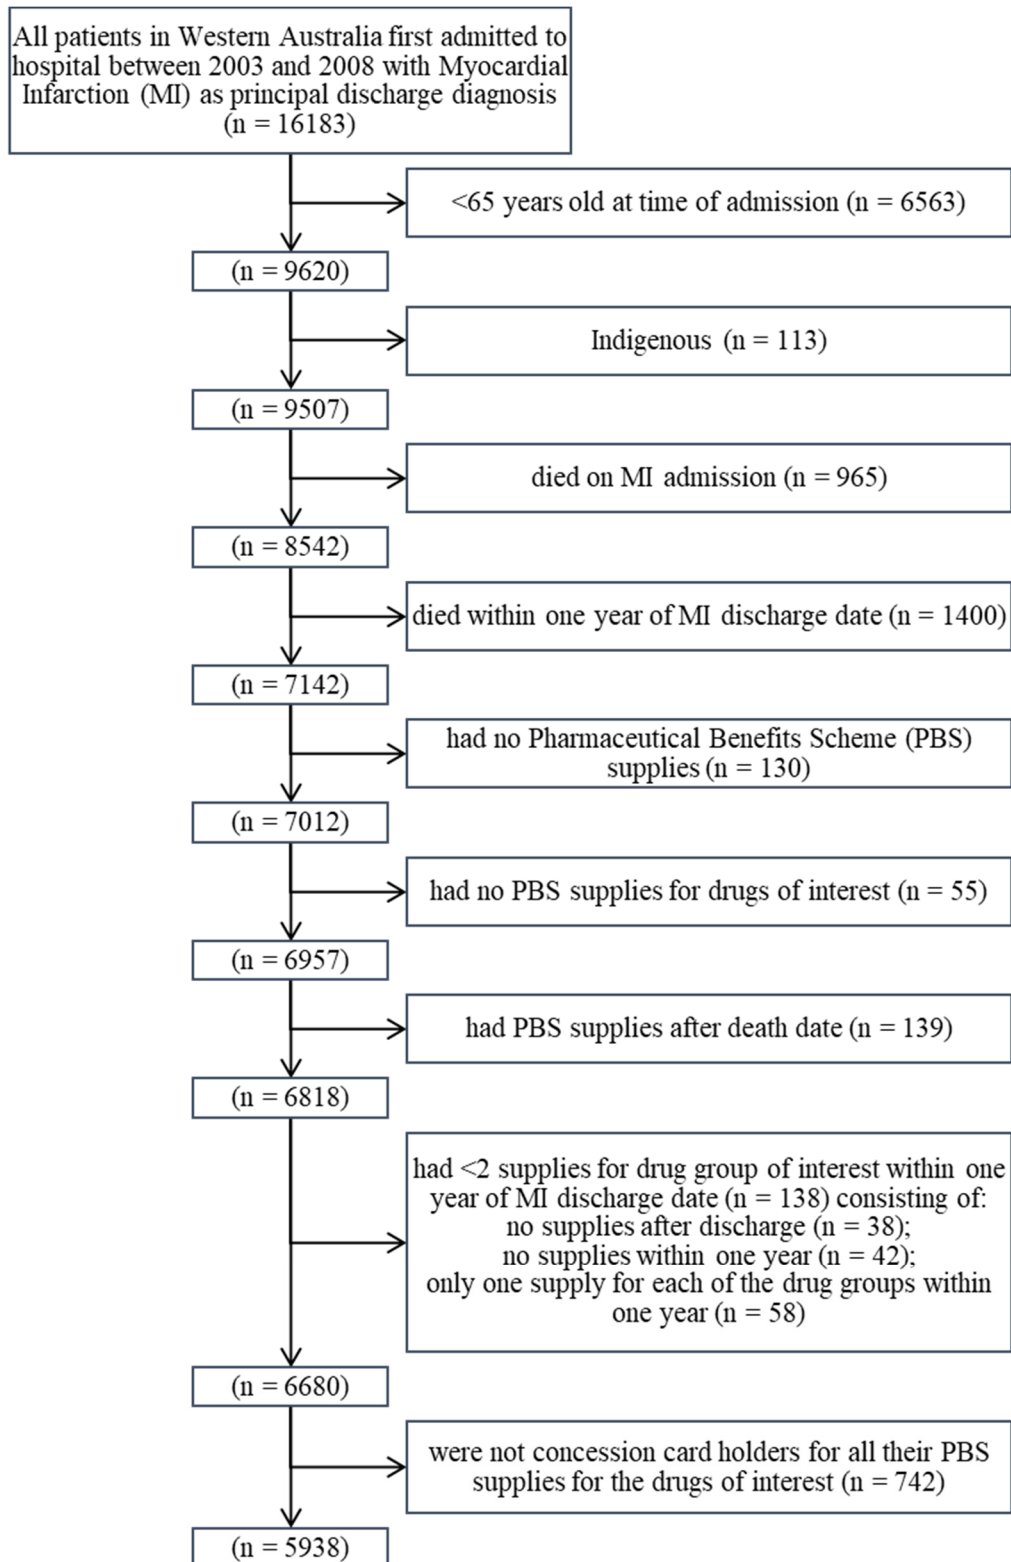

**Supplementary Table S1:** Anatomical Therapeutic Chemical (ATC) codes, dosing assumptions and frequency of supplies for medications in the study cohort.

| ATC code     | Category, Name                                       | Dosing (per day) | Total supply frequency in study cohort |
|--------------|------------------------------------------------------|------------------|----------------------------------------|
| <b>B01A</b>  | <b>Antithrombotic agents</b>                         |                  |                                        |
| B01AC04      | Clopidogrel                                          | 1                | 45570                                  |
| <b>C07</b>   | <b>Beta-blocking agents</b>                          |                  |                                        |
| C07AA05      | Propranolol (50)                                     | 1                | 1                                      |
| C07AA05      | Propranolol (100)                                    | 2                | 133                                    |
| C07AA07      | Sotalol                                              | 1                | 0                                      |
| C07AB02      | Metoprolol (tartrate)                                | 2                | 15883                                  |
| C07AB02      | Metoprolol (succinate)                               | 1                | 1092                                   |
| C07AB03      | Atenolol                                             | 1                | 8518                                   |
| C07AB07      | Bisoprolol                                           | 1                | 3015                                   |
| C07AB11      | s-Atenolol                                           | 1                | 0                                      |
| C07AB12      | Nebivolol                                            | 1                | 0                                      |
| C07AG02      | Carvedilol                                           | 2                | 3696                                   |
| <b>C09</b>   | <b>Agents acting on the renin-angiotensin system</b> |                  |                                        |
| <b>C09A</b>  | <b>Ace inhibitors, plain</b>                         |                  |                                        |
| C09AA01      | Captopril                                            | 3                | 150                                    |
| C09AA02      | Enalapril                                            | 1                | 1018                                   |
| C09AA03      | Lisinopril                                           | 1                | 781                                    |
| C09AA04      | Perindopril                                          | 1                | 9424                                   |
| C09AA05      | Ramipril                                             | 1                | 29209                                  |
| C09AA06      | Quinapril                                            | 1                | 662                                    |
| C09AA09      | Fosinopril                                           | 1                | 668                                    |
| C09AA10      | Trandolapril                                         | 1                | 738                                    |
| <b>C09C</b>  | <b>Angiotensin II antagonists, plain</b>             |                  |                                        |
| C09CA01      | Losartan                                             | 1                | 0                                      |
| C09CA02      | Eprosartan                                           | 1                | 212                                    |
| C09CA03      | Valsartan                                            | 1                | 2                                      |
| C09CA04      | Irbesartan                                           | 1                | 7181                                   |
| C09CA06      | Candesartan                                          | 1                | 2659                                   |
| C09CA07      | Telmisartan                                          | 1                | 1417                                   |
| C09CA08      | Olmesartan medoxomil                                 | 1                | 15                                     |
| <b>C10</b>   | <b>Lipid modifying agents</b>                        |                  |                                        |
| <b>C10AA</b> | <b>HMG-CoA reductase inhibitors (statins)</b>        |                  |                                        |
| C10AA01      | Simvastatin                                          | 1                | 14346                                  |
| C10AA02      | Lovastatin                                           | 1                | 0                                      |

| <b>ATC code</b> | <b>Category, Name</b> | <b>Dosing<br/>(per day)</b> | <b>Total supply frequency<br/>in study cohort</b> |
|-----------------|-----------------------|-----------------------------|---------------------------------------------------|
| C10AA03         | Pravastatin           | 1                           | 4993                                              |
| C10AA04         | Fluvastatin           | 1                           | 118                                               |
| C10AA05         | Atorvastatin          | 1                           | 35115                                             |
| C10AA07         | Rosuvastatin          | 1                           | 1671                                              |

**Supplementary Table S2:** Diagnosis and procedure codes used to derive covariates for regression models.

| <b>Comorbidity/Procedure</b>                 | <b>ICD codes (ICD-9-CM, ICD-10-AM)</b>                                                                                                                                                                                                                                                                                                                                                                                                                                                                                                                             |
|----------------------------------------------|--------------------------------------------------------------------------------------------------------------------------------------------------------------------------------------------------------------------------------------------------------------------------------------------------------------------------------------------------------------------------------------------------------------------------------------------------------------------------------------------------------------------------------------------------------------------|
| Hypertension                                 | 401-405, I10-I15                                                                                                                                                                                                                                                                                                                                                                                                                                                                                                                                                   |
| Heart Failure                                | 428, I50                                                                                                                                                                                                                                                                                                                                                                                                                                                                                                                                                           |
| Atrial Fibrillation                          | 427.3, I48                                                                                                                                                                                                                                                                                                                                                                                                                                                                                                                                                         |
| Diabetes                                     | 250, E10-E14                                                                                                                                                                                                                                                                                                                                                                                                                                                                                                                                                       |
| Chronic Obstructive Pulmonary Disease        | 490-494, 496, J40-J47                                                                                                                                                                                                                                                                                                                                                                                                                                                                                                                                              |
| Stroke                                       | 430, 431, 433, 434, 436, I60, I61, I63, I64                                                                                                                                                                                                                                                                                                                                                                                                                                                                                                                        |
| Peripheral Vascular Disease                  | 440-448, I70-I79                                                                                                                                                                                                                                                                                                                                                                                                                                                                                                                                                   |
| Chronic Kidney Disease                       | <i>01Jan1988 to 30Jun1999</i><br>250.4, 590.0, 590.2, 590.3, 590.8, 593.0, 593.1, 593.2, 593.6, 593.9, 599.7, 753.0, 753.1, 753.2, 753.3, 753.4, 996.1, V42.0, V45.1, 403, 404, 580-583, 585-589, V56, 405.01, 405.11, 405.91, 405.02, 405.12, 405.92, 593.81, 996.81, 996.73<br><br><i>01Jul1999 to 31Dec2014:</i><br>E10.2, E11.2, E12.2, E13.2, E14.2, I15.0, I15.1, N39.1, N39.2, T82.4, Z94.0, Z99.2, I12, I13, N00-N12, N14, N15, N16, N18, N19, N25-N28, Q60-Q63, Z49                                                                                       |
| Coronary Heart Disease                       | 410-414, I20-I25                                                                                                                                                                                                                                                                                                                                                                                                                                                                                                                                                   |
| Coronary Artery Revascularisation Procedures | 36.01, 36.02, 36.05, 36.06, 36.07, 36.10-36.19, 35335-00, 35341-00, 38309-00, 38315-00, 35304-00, 35305-00, 38303-00, 38300-00, 35338-00, 35338-01, 35344-00, 35344-01, 38312-00, 38312-01, 38318-00, 38318-01, 35310-00, 35310-01, 35310-02, 38306-00, 38306-01, 38306-02, 90218-00, 90218-01, 90218-02, 90218-03, 38497-00, 38497-01, 38497-02, 38497-03, 38497-04, 38497-05, 38497-06, 38497-07, 38500-01, 38500-02, 38500-03, 38500-04, 38500-05, 38503-00, 38503-01, 38503-02, 38503-03, 38503-04, 90201-00, 90201-01, 90201-02, 90201-03, 38500-00, 38503-05 |

ICD-9-CM = International Classification of Diseases, 9<sup>th</sup> revision, Clinical Modification (includes procedure codes); ICD-10-AM = International Classification of Diseases, 10<sup>th</sup> revision Australian Modification (includes procedure codes).

**Supplementary Table S3:** Comparison of usage and median adherence for the 4 drug groups between men and women in the study cohort.

| Drug group       | Users, n (%)    |                   |         | Median PDC adherence (%) |                   |         |
|------------------|-----------------|-------------------|---------|--------------------------|-------------------|---------|
|                  | Men<br>(n=3417) | Women<br>(n=2521) | p value | Men<br>(n=3417)          | Women<br>(n=2521) | p value |
| Statins          | 3091 (90.5)     | 2088 (82.8)       | <0.0001 | 87.0                     | 86.7              | 0.13    |
| Beta<br>blockers | 2665 (78.0)     | 1933 (76.7)       | 0.23    | 66.2                     | 63.0              | 0.03    |
| RASI             | 2853 (83.5)     | 2043 (81.0)       | 0.01    | 87.8                     | 87.2              | 0.07    |
| Clopidogrel      | 2525 (73.9)     | 1673 (66.4)       | <0.0001 | 86.7                     | 86.2              | 0.18    |

PDC: proportion of days covered; RASI: renin-angiotensin system inhibitors; p value for usage comparison is the chi-squared test; p value for adherence comparison is the Wilcoxon rank-sum test with continuity correction.

**Supplementary Table S4:** Adjusted hazard ratios (HR) and 95% confidence intervals (CI) for various PDC adherence levels compared to 95% as reference, by drug group and outcome.

| Drug group   | PDC adherence level | All-cause death      | MACE                 |
|--------------|---------------------|----------------------|----------------------|
|              |                     | Adjusted HR (95% CI) | Adjusted HR (95% CI) |
| Statin       | 50                  | 1.52 (1.11, 2.09)    | 1.34 (1.08, 1.68)    |
|              | 60                  | 1.48 (1.07, 2.04)    | 1.29 (1.03, 1.61)    |
|              | 70                  | 1.37 (1.04, 1.80)    | 1.21 (1.00, 1.47)    |
|              | 80                  | 1.22 (1.02, 1.46)    | 1.13 (0.99, 1.28)    |
|              | 90                  | 1.07 (1.01, 1.14)    | 1.04 (1.00, 1.09)    |
|              | 95                  | 1.00                 | 1.00                 |
| Beta-blocker | 50                  | 1.13 (0.87, 1.49)    | 1.07 (0.88, 1.29)    |
|              | 60                  | 1.11 (0.85, 1.45)    | 1.06 (0.88, 1.28)    |
|              | 70                  | 1.08 (0.86, 1.36)    | 1.05 (0.89, 1.23)    |
|              | 80                  | 1.05 (0.90, 1.22)    | 1.03 (0.93, 1.15)    |
|              | 90                  | 1.02 (0.97, 1.07)    | 1.01 (0.97, 1.05)    |
|              | 95                  | 1.00                 | 1.00                 |
| RASi         | 50                  | 1.35 (1.03, 1.76)    | 1.23 (1.01, 1.50)    |
|              | 60                  | 1.38 (1.05, 1.81)    | 1.22 (1.00, 1.49)    |
|              | 70                  | 1.32 (1.05, 1.67)    | 1.18 (1.00, 1.40)    |
|              | 80                  | 1.20 (1.03, 1.40)    | 1.11 (0.99, 1.25)    |
|              | 90                  | 1.06 (1.01, 1.12)    | 1.04 (1.00, 1.08)    |
|              | 95                  | 1.00                 | 1.00                 |
| Clopidogrel  | 50                  | 1.43 (1.03, 1.98)    | 1.16 (0.92, 1.46)    |
|              | 60                  | 1.45 (1.04, 2.02)    | 1.19 (0.94, 1.51)    |
|              | 70                  | 1.37 (1.03, 1.81)    | 1.17 (0.96, 1.43)    |
|              | 80                  | 1.23 (1.02, 1.48)    | 1.11 (0.98, 1.27)    |
|              | 90                  | 1.07 (1.01, 1.14)    | 1.04 (0.99, 1.08)    |
|              | 95                  | 1.00                 | 1.00                 |

PDC, proportion of days covered; RASi, renin-angiotensin system inhibitor; MACE, major adverse cardiac event.

**Supplementary Table S5:** Adjusted hazard ratios (HR) and 95% confidence intervals (CI) for covariates in Cox regression models for all-cause death by drug group.

| Covariate                                      | All PDC values           |                                |                           | PDC limited to 60-100%          |                         |                                |
|------------------------------------------------|--------------------------|--------------------------------|---------------------------|---------------------------------|-------------------------|--------------------------------|
|                                                | Statin user*<br>(n=5179) | Beta-blocker*<br>user (n=4598) | Statin user*†<br>(n=4555) | Beta-blocker<br>user*† (n=2545) | RASI user*†<br>(n=4079) | Clopidogrel<br>user*† (n=3436) |
| Female                                         | 0.75 (0.61, 0.93)        | 0.79 (0.64, 0.97)              | 0.78 (0.62, 0.99)         | 0.85 (0.65, 1.13)               | 0.82 (0.66, 1.02)       | 0.78 (0.60, 1.00)              |
| Age (years)                                    | 1.06 (1.05, 1.08)        | 1.06 (1.04, 1.07)              | 1.06 (1.04, 1.08)         | 1.06 (1.04, 1.08)               | 1.07 (1.06, 1.09)       | 1.06 (1.05, 1.09)              |
| Accessibility/Remoteness<br>Index of Australia |                          |                                |                           |                                 |                         |                                |
| Major Cities                                   | 1.00                     | 1.00                           | 1.00                      | 1.00                            | 1.00                    | 1.00                           |
| Inner Regional                                 | 1.06 (0.85, 1.33)        | 1.03 (0.82, 1.29)              | 1.06 (0.83, 1.36)         | 1.10 (0.82, 1.49)               | 1.07 (0.85, 1.34)       | 1.33 (1.02, 1.72)              |
| Outer Regional                                 | 0.99 (0.67, 1.47)        | 0.94 (0.64, 1.38)              | 1.06 (0.70, 1.59)         | 1.09 (0.67, 1.78)               | 0.77 (0.49, 1.19)       | 0.88 (0.52, 1.48)              |
| Remote                                         | 0.62 (0.23, 1.67)        | 0.66 (0.25, 1.79)              | 0.55 (0.17, 1.72)         | 0.52 (0.13, 2.13)               | 0.99 (0.41, 2.42)       | 0.64 (0.20, 2.02)              |
| Very Remote                                    | 1.88 (0.88, 4.01)        | 1.57 (0.64, 3.84)              | 1.20 (0.38, 3.79)         | 0.95 (0.23, 3.89)               | 1.08 (0.40, 2.91)       | 2.25 (0.83, 6.14)              |
| Comorbidities                                  |                          |                                |                           |                                 |                         |                                |
| Hypertension                                   | 0.97 (0.72, 1.30)        | 0.96 (0.72, 1.27)              | 0.90 (0.66, 1.24)         | 0.74 (0.50, 1.11)               | 0.84 (0.63, 1.12)       | 0.83 (0.59, 1.16)              |
| Heart failure                                  | 1.66 (1.32, 2.09)        | 1.81 (1.44, 2.28)              | 1.63 (1.27, 2.09)         | 1.69 (1.25, 2.29)               | 1.62 (1.27, 2.06)       | 1.66 (1.26, 2.19)              |
| Atrial fibrillation                            | 1.51 (1.22, 1.86)        | 1.34 (1.09, 1.65)              | 1.41 (1.12, 1.76)         | 1.47 (1.12, 1.94)               | 1.34 (1.08, 1.67)       | 1.66 (1.29, 2.12)              |
| Diabetes                                       | 1.25 (1.01, 1.55)        | 1.19 (0.96, 1.48)              | 1.18 (0.93, 1.49)         | 1.06 (0.80, 1.41)               | 1.29 (1.03, 1.62)       | 0.98 (0.75, 1.28)              |
| Chronic Obstructive<br>Pulmonary Disease       | 1.41 (1.12, 1.77)        | 1.45 (1.15, 1.82)              | 1.47 (1.14, 1.88)         | 1.49 (1.09, 2.02)               | 1.69 (1.34, 2.13)       | 1.53 (1.17, 2.00)              |
| Chronic Kidney Disease                         | 1.42 (1.13, 1.77)        | 1.56 (1.25, 1.94)              | 1.37 (1.07, 1.75)         | 1.64 (1.22, 2.21)               | 1.39 (1.10, 1.75)       | 1.50 (1.14, 1.96)              |
| Stroke                                         | 1.55 (1.19, 2.00)        | 1.62 (1.26, 2.08)              | 1.60 (1.21, 2.12)         | 1.69 (1.22, 2.35)               | 1.79 (1.38, 2.32)       | 1.57 (1.17, 2.12)              |
| Peripheral Vascular Disease                    | 1.47 (1.18, 1.84)        | 1.29 (1.03, 1.61)              | 1.47 (1.15, 1.87)         | 1.45 (1.08, 1.95)               | 1.30 (1.02, 1.65)       | 1.51 (1.15, 1.97)              |



| Covariate                                     | All PDC values           |                                |                            | PDC limited to 60-100%           |                          |                                 |
|-----------------------------------------------|--------------------------|--------------------------------|----------------------------|----------------------------------|--------------------------|---------------------------------|
|                                               | Statin user*<br>(n=5179) | Beta-blocker*<br>user (n=4598) | Statin user**†<br>(n=4555) | Beta-blocker<br>user**† (n=2545) | RASI user**†<br>(n=4079) | Clopidogrel<br>user**† (n=3436) |
| CHD history                                   |                          |                                |                            |                                  |                          |                                 |
| Prior CHD                                     | 1.23 (0.97, 1.55)        | 1.33 (1.06, 1.67)              | 1.20 (0.93, 1.55)          | 1.38 (1.01, 1.88)                | 0.96 (0.76, 1.22)        | 1.11 (0.83, 1.48)               |
| Prior CARP                                    | 0.84 (0.63, 1.12)        | 0.75 (0.56, 1.01)              | 0.93 (0.68, 1.26)          | 0.76 (0.52, 1.11)                | 0.92 (0.66, 1.27)        | 0.94 (0.67, 1.31)               |
| CHD admission during one-year landmark period |                          |                                |                            |                                  |                          |                                 |
| With CARP‡                                    | 0.50 (0.39, 0.65)        | 0.50 (0.38, 0.66)              | 0.45 (0.34, 0.61)          | 0.52 (0.36, 0.76)                | 0.49 (0.36, 0.66)        | 0.59 (0.44, 0.80)               |
| Without CARP‡                                 | 1.05 (0.80, 1.38)        | 1.17 (0.91, 1.51)              | 1.04 (0.78, 1.40)          | 1.24 (0.89, 1.73)                | 1.08 (0.82, 1.42)        | 1.23 (0.90, 1.67)               |
| Neither                                       | 1.00                     | 1.00                           | 1.00                       | 1.00                             | 1.00                     | 1.00                            |
| Concomitant drugs                             |                          |                                |                            |                                  |                          |                                 |
| Statin user                                   | -                        | 0.58 (0.45, 0.74)              | -                          | 0.59 (0.42, 0.83)                | 0.64 (0.50, 0.83)        | 0.71 (0.51, 0.98)               |
| Beta-blocker user                             | 1.00 (0.79, 1.28)        | -                              | 0.91 (0.70, 1.17)          | -                                | 1.17 (0.92, 1.50)        | 1.12 (0.84, 1.51)               |
| RASI user                                     | 1.09 (0.84, 1.43)        | 1.01 (0.78, 1.30)              | 1.10 (0.82, 1.48)          | 0.99 (0.69, 1.42)                | -                        | 1.06 (0.77, 1.45)               |
| Clopidogrel user                              | 1.07 (0.86, 1.34)        | 1.05 (0.84, 1.30)              | 1.01 (0.79, 1.28)          | 1.06 (0.79, 1.42)                | 0.99 (0.79, 1.24)        | -                               |

\*Users can be in multiple drug groups.

†Only includes users with PDC 60-100%.

‡CHD admission during the landmark period with or without a CARP during the index myocardial infarction admission or within the landmark period.  
CHD, coronary heart disease; CARP, coronary artery revascularisation procedure; RASI, renin-angiotensin system inhibitor.

**Supplementary Table S6:** Adjusted hazard ratios (HR) and 95% confidence intervals (CI) for covariates in Cox regression models for MACE (major adverse cardiac event) outcome by drug group.

| Covariate                                      | All PDC values           |                                |                           | PDC limited to 60-100%          |                         |                                |
|------------------------------------------------|--------------------------|--------------------------------|---------------------------|---------------------------------|-------------------------|--------------------------------|
|                                                | Statin user*<br>(n=5179) | Beta-blocker*<br>user (n=4598) | Statin user*†<br>(n=4555) | Beta-blocker<br>user*† (n=2545) | RASI user*†<br>(n=4079) | Clopidogrel<br>user*† (n=3436) |
| Female                                         | 0.88 (0.76, 1.02)        | 0.87 (0.75, 1.01)              | 0.90 (0.76, 1.05)         | 0.87 (0.75, 1.01)               | 0.84 (0.72, 0.99)       | 0.84 (0.70, 1.00)              |
| Age (years)                                    | 1.04 (1.03, 1.06)        | 1.04 (1.03, 1.05)              | 1.04 (1.03, 1.06)         | 1.04 (1.03, 1.05)               | 1.05 (1.04, 1.06)       | 1.04 (1.03, 1.06)              |
| Accessibility/Remoteness<br>Index of Australia |                          |                                |                           |                                 |                         |                                |
| Major Cities                                   | 1.00                     | 1.00                           | 1.00                      | 1.00                            | 1.00                    | 1.00                           |
| Inner Regional                                 | 0.97 (0.83, 1.13)        | 0.98 (0.83, 1.15)              | 0.94 (0.79, 1.12)         | 0.98 (0.83, 1.15)               | 0.95 (0.81, 1.13)       | 1.01 (0.84, 1.21)              |
| Outer Regional                                 | 0.89 (0.67, 1.19)        | 0.84 (0.63, 1.13)              | 0.93 (0.69, 1.26)         | 0.84 (0.63, 1.13)               | 0.71 (0.51, 0.98)       | 0.76 (0.53, 1.09)              |
| Remote                                         | 0.80 (0.42, 1.49)        | 0.88 (0.47, 1.64)              | 0.73 (0.36, 1.48)         | 0.88 (0.47, 1.64)               | 0.83 (0.43, 1.61)       | 0.77 (0.38, 1.56)              |
| Very Remote                                    | 1.38 (0.76, 2.52)        | 1.10 (0.54, 2.22)              | 1.05 (0.47, 2.36)         | 1.10 (0.54, 2.22)               | 0.94 (0.45, 2.00)       | 0.92 (0.38, 2.24)              |
| Comorbidities                                  |                          |                                |                           |                                 |                         |                                |
| Hypertension                                   | 1.14 (0.93, 1.41)        | 1.05 (0.86, 1.29)              | 1.10 (0.88, 1.39)         | 1.05 (0.86, 1.29)               | 0.98 (0.79, 1.21)       | 1.10 (0.86, 1.40)              |
| Heart failure                                  | 1.37 (1.17, 1.61)        | 1.48 (1.26, 1.74)              | 1.32 (1.11, 1.57)         | 1.48 (1.26, 1.74)               | 1.29 (1.09, 1.53)       | 1.34 (1.11, 1.62)              |
| Atrial fibrillation                            | 1.18 (1.02, 1.37)        | 1.12 (0.96, 1.30)              | 1.16 (0.99, 1.36)         | 1.12 (0.96, 1.30)               | 1.14 (0.97, 1.34)       | 1.28 (1.07, 1.53)              |
| Diabetes                                       | 1.33 (1.15, 1.55)        | 1.34 (1.15, 1.56)              | 1.36 (1.16, 1.60)         | 1.34 (1.15, 1.56)               | 1.45 (1.23, 1.71)       | 1.18 (0.99, 1.41)              |
| Chronic Obstructive<br>Pulmonary Disease       | 1.26 (1.07, 1.49)        | 1.26 (1.06, 1.49)              | 1.31 (1.10, 1.57)         | 1.26 (1.06, 1.49)               | 1.47 (1.23, 1.75)       | 1.35 (1.11, 1.64)              |
| Chronic Kidney Disease                         | 1.32 (1.12, 1.55)        | 1.47 (1.25, 1.73)              | 1.32 (1.11, 1.58)         | 1.47 (1.25, 1.73)               | 1.30 (1.09, 1.55)       | 1.34 (1.10, 1.62)              |
| Stroke                                         | 1.31 (1.08, 1.59)        | 1.36 (1.12, 1.65)              | 1.33 (1.07, 1.64)         | 1.36 (1.12, 1.65)               | 1.42 (1.16, 1.75)       | 1.36 (1.09, 1.70)              |
| Peripheral Vascular Disease                    | 1.26 (1.08, 1.49)        | 1.13 (0.96, 1.34)              | 1.26 (1.06, 1.51)         | 1.13 (0.96, 1.34)               | 1.11 (0.92, 1.33)       | 1.35 (1.12, 1.64)              |

| Covariate                                     | All PDC values           |                                |                            | PDC limited to 60-100%           |                          |                                 |
|-----------------------------------------------|--------------------------|--------------------------------|----------------------------|----------------------------------|--------------------------|---------------------------------|
|                                               | Statin user*<br>(n=5179) | Beta-blocker*<br>user (n=4598) | Statin user**†<br>(n=4555) | Beta-blocker<br>user**† (n=2545) | RASI user**†<br>(n=4079) | Clopidogrel<br>user**† (n=3436) |
| CHD history                                   |                          |                                |                            |                                  |                          |                                 |
| Prior CHD                                     | 1.51 (1.28, 1.79)        | 1.46 (1.24, 1.73)              | 1.51 (1.26, 1.82)          | 1.46 (1.24, 1.73)                | 1.19 (1.00, 1.42)        | 1.49 (1.22, 1.82)               |
| Prior CARP                                    | 1.15 (0.96, 1.39)        | 1.11 (0.91, 1.35)              | 1.17 (0.96, 1.44)          | 1.11 (0.91, 1.35)                | 1.23 (0.99, 1.53)        | 1.12 (0.90, 1.40)               |
| CHD admission during one-year landmark period |                          |                                |                            |                                  |                          |                                 |
| With CARP‡                                    | 0.74 (0.62, 0.88)        | 0.73 (0.61, 0.88)              | 0.70 (0.58, 0.84)          | 0.73 (0.61, 0.88)                | 0.75 (0.61, 0.91)        | 0.92 (0.75, 1.12)               |
| Without CARP‡                                 | 1.35 (1.11, 1.64)        | 1.43 (1.18, 1.73)              | 1.37 (1.11, 1.69)          | 1.43 (1.18, 1.73)                | 1.40 (1.13, 1.72)        | 1.47 (1.16, 1.85)               |
| Neither                                       | 1.00                     | 1.00                           | 1.00                       | 1.00                             | 1.00                     | 1.00                            |
| Concomitant drugs                             |                          |                                |                            |                                  |                          |                                 |
| Statin user                                   | -                        | 0.70 (0.57, 0.85)              | -                          | 0.70 (0.57, 0.85)                | 0.65 (0.53, 0.80)        | 0.71 (0.55, 0.90)               |
| Beta-blocker user                             | 1.17 (0.98, 1.40)        | -                              | 1.07 (0.88, 1.29)          | -                                | 1.15 (0.95, 1.38)        | 1.20 (0.97, 1.49)               |
| RASI user                                     | 1.02 (0.85, 1.23)        | 0.97 (0.81, 1.16)              | 1.05 (0.85, 1.29)          | 0.97 (0.81, 1.16)                | -                        | 1.00 (0.80, 1.24)               |
| Clopidogrel user                              | 1.17 (0.99, 1.37)        | 1.18 (1.00, 1.39)              | 1.23 (1.02, 1.47)          | 1.18 (1.00, 1.39)                | 1.05 (0.89, 1.26)        | -                               |

\*Users can be in multiple drug groups.

†Only includes users with PDC 60-100%.

‡CHD admission during the landmark period with or without a CARP during the index myocardial infarction admission or within the landmark period.  
CHD, coronary heart disease; CARP, coronary artery revascularisation procedure; RASI, renin-angiotensin system inhibitor.
